# Supplementary material for: Can we predict specific numbers of catalytically important molecules of water in H/D exchange in aromatic systems? A combined NMR and DFT study
Source: Royal Society of Chemistry journal article supplement (doi:10.1039/d4nj03276d), 2025-01-01
Supplement: d4nj03276d3.pdf [file d4nj03276d3.pdf]

## SUPPLEMENTARY MATERIAL

# Can we predict specific numbers of catalytically important molecules of water in H/D exchange in aromatic systems? A combined NMR and DFT study

Photini Chalkidou, Themistoklis Venianakis, George Papamokos, Michael Siskos\* and Ioannis P. Gerothanassis\*

Section of Organic Chemistry and Biochemistry, Department of Chemistry, University of Ioannina, Ioannina, GR, 45110, Greece

\* Corresponding authors

E-mail address: [msiskos@uoi.gr](mailto:msiskos@uoi.gr) (M.G. Siskos), [igeroth@uoi.gr](mailto:igeroth@uoi.gr) (I.P. Gerothanassis)

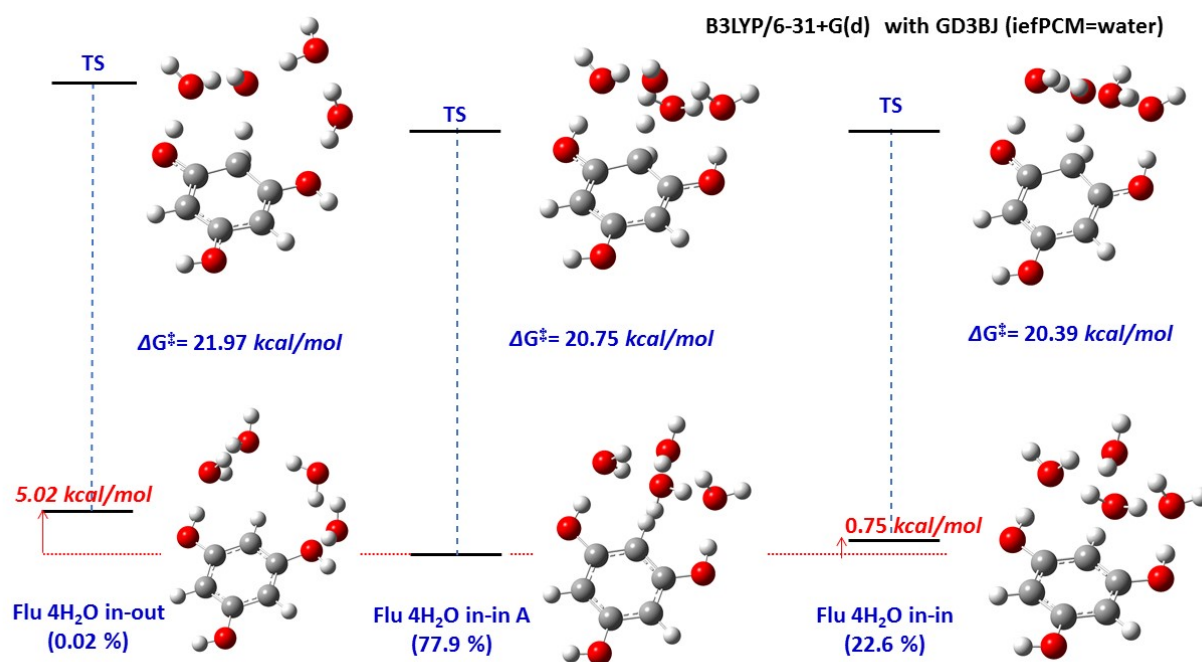

**Fig. S1** The mechanistic pathway of the aromatic hydrogen exchange process of the complex of the neutral phloroglucinol with four molecules of H<sub>2</sub>O and the two phenol -OH groups in the “in-in” configuration at the B3LYP/6-31+G(d)/GD3BJ level. In parenthesis are the Boltzmann populations (Tables 2 and S2).

CAM-B3LYP/6-31+G(d) with GD3BJ

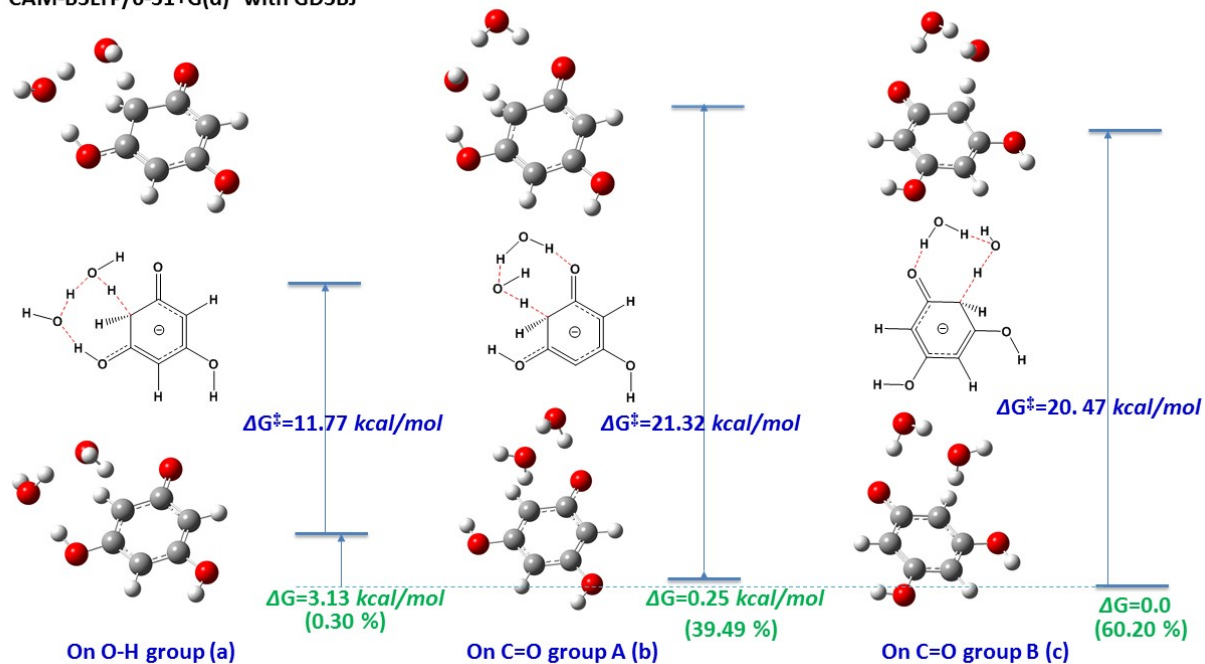

**Fig. S2** Three possible mechanistic pathways of the aromatic hydrogen exchange process of the complex of the phloroglucinol anion with two molecules of  $\text{H}_2\text{O}$ : one molecule of  $\text{H}_2\text{O}$  on the phenol -OH group (a), and one molecule of  $\text{H}_2\text{O}$  on the C=O bond (b) and (c), at the CAM-B3LYP/6-31+G(d)/GD3BJ level. In parenthesis are the Boltzmann populations (Tables 2 and S3).

**Table S1** Computed activation enthalpy ( $\Delta H_{comp}^{\ddagger}$ ), activation entropy ( $-T\Delta S_{comp}^{\ddagger}$ ) and Gibbs activation energy ( $\Delta G_{comp}^{\ddagger}$ ), for neutral phloroglucinol for various molecular water solvation species and computational methods

| Calculation method                                                                                   | $\Delta H_{comp}^{\ddagger}$<br>kcal mol <sup>-1</sup> | $\Delta S_{comp}^{\ddagger}$<br>cal mol <sup>-1</sup> | $-T\Delta S_{comp}^{\ddagger}$<br>kcal mol <sup>-1</sup> | $\Delta G_{comp}^{\ddagger}$<br>kcal mol <sup>-1</sup> | Imaginary<br>frequency<br>cm <sup>-1</sup> |
|------------------------------------------------------------------------------------------------------|--------------------------------------------------------|-------------------------------------------------------|----------------------------------------------------------|--------------------------------------------------------|--------------------------------------------|
| <b>Phloroglucinol complex with 2H<sub>2</sub>O (IefPCM=H<sub>2</sub>O)</b>                           |                                                        |                                                       |                                                          |                                                        |                                            |
| B3LYP/6-31+G(d)                                                                                      | 21.53                                                  | -7.94                                                 | 2.10                                                     | 27.11                                                  | -746.98                                    |
| CAM-B3LYP/6-31+G(d)                                                                                  | 21.77                                                  | -17.58                                                | 5.24                                                     | 27.01                                                  | -891.08                                    |
| PBE0/6-31+G(d)                                                                                       | 19.81                                                  | -12.43                                                | 3.68                                                     | 23.45                                                  | -802.65                                    |
| APFD/6-31+G(d)                                                                                       | 17.21                                                  | -11.32                                                | 3.38                                                     | 20.59                                                  | -843.46                                    |
| $\omega$ B97XD/6-31+G(d)                                                                             | 22.65                                                  | -11.87                                                | 3.54                                                     | 26.19                                                  | -693.18                                    |
| M06-2X/6-31+G(d)                                                                                     | 22.30                                                  | -13.57                                                | 4.05                                                     | 26.35                                                  | -1141.12                                   |
| B3LYP/6-31+G(d) with<br>GD3BJ                                                                        | 19.57                                                  | -12.02                                                | 3.58                                                     | 23.15                                                  | -740.39                                    |
| CAM-B3LYP/6-31+G(d) with<br>GD3BJ                                                                    | 20.98                                                  | -12.39                                                | 3.70                                                     | 24.68                                                  | -891.97                                    |
| PBE0/6-31+G(d) with GD3BJ                                                                            | 19.35                                                  | -12.77                                                | 3.81                                                     | 23.16                                                  | -802.44                                    |
| <b>Phloroglucinol complex with 3H<sub>2</sub>O (IefPCM=H<sub>2</sub>O) (conformation "in-out")</b>   |                                                        |                                                       |                                                          |                                                        |                                            |
| B3LYP/6-31+G(d) (21.03 %)                                                                            | 26.06                                                  | -13.86                                                | 4.13                                                     | 30.19                                                  | -259.77                                    |
| Ketone                                                                                               | 16.53                                                  | -16.91                                                | 5.04                                                     | 21.57                                                  |                                            |
| CAM-B3LYP/6-31+G(d)<br>(34.95 %)                                                                     | 27.41                                                  | -13.91                                                | 4.15                                                     | 31.56                                                  | -422.76                                    |
| ketone                                                                                               | 17.96                                                  | -17.96                                                | 5.48                                                     | 23.44                                                  |                                            |
| PBE0/6-31+G(d) (10.72 %)                                                                             | 25.66                                                  | -11.56                                                | 3.45                                                     | 29.11                                                  | -192.9                                     |
| ketone                                                                                               | 17.66                                                  | -11.34                                                | 3.38                                                     | 21.04                                                  |                                            |
| APFD/6-31+G(d) ((10.94 %)                                                                            | 23.34                                                  | -9.84                                                 | 2.93                                                     | 26.28                                                  | -182.97                                    |
| ketone                                                                                               | 14.18                                                  | -14.38                                                | 4.29                                                     | 18.47                                                  |                                            |
| $\omega$ B97XD/6-31+G(d) ((17.12 %)                                                                  | 27.49                                                  | -11.32                                                | 3.37                                                     | 30.86                                                  | -262.48                                    |
| ketone                                                                                               | 18.78                                                  | -14.11                                                | 4.21                                                     | 22.98                                                  |                                            |
| M06-2X/6-31+G(d) (1.34 %)                                                                            | 30.22                                                  | -5.42                                                 | 1.62                                                     | 31.84                                                  | -491.76                                    |
| ketone                                                                                               | 17.13                                                  | -15.65                                                | 4.67                                                     | 21.80                                                  |                                            |
| B3LYP/6-31+G(d) with<br>GD3BJ (14.19 %)                                                              | 24.33                                                  | -11.34                                                | 3.38                                                     | 27.52                                                  | -207.01                                    |
| ketone                                                                                               | 15.95                                                  | -15.10                                                | 4.50                                                     | 20.45                                                  |                                            |
| CAM-B3LYP/6-31+G(d) with<br>GD3BJ (16.10 %)                                                          | 26.71                                                  | -10.74                                                | 3.20                                                     | 29.71                                                  | -389.14                                    |
| ketone                                                                                               | 16.99                                                  | -15.88                                                | 4.73                                                     | 21.72                                                  |                                            |
| PBE0/6-31+G(d) with GD3BJ<br>(9.65 %)                                                                | 24.64                                                  | -10.46                                                | 3.12                                                     | 27.76                                                  | -182.64                                    |
| ketone                                                                                               | 14.92                                                  | -16.32                                                | 4.87                                                     | 19.78                                                  |                                            |
| <b>Phloroglucinol complex with 3H<sub>2</sub>O (IefPCM=H<sub>2</sub>O) (conformation "in-out A")</b> |                                                        |                                                       |                                                          |                                                        |                                            |
| B3LYP/6-31+G(d) (0.16%)                                                                              | 23.09                                                  | -14.17                                                | 4.22                                                     | 27.31                                                  | -259.77                                    |
| CAM-B3LYP/6-31+G(d)<br>(0.12%)                                                                       | 24.03                                                  | -13.94                                                | 4.168                                                    | 28.18                                                  | -422.76                                    |
| PBE0/6-31+G(d) (0.13 %)                                                                              | 22.47                                                  | -13.52                                                | 4.03                                                     | 26.50                                                  | -192.9                                     |
| APFD/6-31+G(d) (0.046%)                                                                              | 20.14                                                  | -9.70                                                 | 2.89                                                     | 23.03                                                  | -182.97                                    |
| $\omega$ B97XD/6-31+G(d) ((0.48 %)                                                                   | 24.65                                                  | -13.77                                                | 4.11                                                     | 28.75                                                  | -262.48                                    |
| M06-2X/6-31+G(d) (0.13 %)                                                                            | 26.92                                                  | -11.72                                                | 3.55                                                     | 30.47                                                  | -491.76                                    |
| B3LYP/6-31+G(d) with<br>GD3BJ (0.82 %)                                                               | 21.24                                                  | -15.39                                                | 4.59                                                     | 25.832                                                 | -207.01                                    |
| CAM-B3LYP/6-31+G(d) with<br>GD3BJ (0.14 %)                                                           | 23.11                                                  | -12.67                                                | 3.78                                                     | 26.89                                                  | -389.14                                    |
| PBE0/6-31+G(d) with GD3BJ<br>(0.13 %)                                                                | 21.38                                                  | -12.84                                                | 3.83                                                     | 25.21                                                  | -182.64                                    |
| <b>Phloroglucinol complex with 3H<sub>2</sub>O (IefPCM=H<sub>2</sub>O) (conformation "in-in")</b>    |                                                        |                                                       |                                                          |                                                        |                                            |

|                                                                                                     |       |        |      |       |         |
|-----------------------------------------------------------------------------------------------------|-------|--------|------|-------|---------|
| B3LYP/6-31+G(d) (12.71 %)                                                                           | 19.44 | -15.63 | 4.66 | 24.10 | -754.2  |
| ketone                                                                                              | 14.12 | -17.44 | 5.20 | 19.32 |         |
| CAM-B3LYP/6-31+G(d) (37.72 %)                                                                       | 20.46 | -15.43 | 4.60 | 25.06 | -911.4  |
| ketone                                                                                              | 10.52 | -23.06 | 6.88 | 17.40 |         |
| PBE0/6-31+G(d) (48.63 %)                                                                            | 18.35 | -16.12 | 4.80 | 23.15 | -583.2  |
| ketone                                                                                              | 11.91 | -17.64 | 5.26 | 17.17 |         |
| APFD/6-31+G(d) (58.52 %)                                                                            | 15.59 | -15.23 | 4.54 | 20.13 | -537.1  |
| ketone                                                                                              | 10.05 | -15.13 | 4.51 | 14.57 |         |
| $\omega$ B97XD/6-31+G(d) (52.04 %)                                                                  | 20.68 | -14.75 | 4.40 | 25.08 | -696.4  |
| ketone                                                                                              | 14.83 | -16.39 | 4.89 | 19.72 |         |
| M06-2X/6-31+G(d) (50.57%)                                                                           | 22.76 | -16.39 | 4.89 | 27.23 | -748.3  |
| ketone                                                                                              | 13.30 | -15.00 | 4.47 | 18.02 |         |
| B3LYP/6-31+G(d) with GD3BJ (46.80 %)                                                                | 17.15 | -15.13 | 4.51 | 21.66 | -698.9  |
| ketone                                                                                              | 12.03 | -15.65 | 4.67 | 16.70 |         |
| CAM-B3LYP/6-31+G(d) with GD3BJ (46.39 %)                                                            | 19.33 | -14.80 | 4.41 | 23.99 | -880.5  |
| ketone                                                                                              | 9.45  | -20.13 | 6.00 | 15.45 |         |
| PBE0/6-31+G(d) with GD3BJ (51.47 %)                                                                 | 17.13 | -15.16 | 4.52 | 21.65 | -548.40 |
| ketone                                                                                              | 10.81 | -15.64 | 4.66 | 15.48 |         |
| <b>Phloroglucinol complex with 3H<sub>2</sub>O (IefPCM=H<sub>2</sub>O) (conformation "in-in A")</b> |       |        |      |       |         |
| B3LYP/6-31+G(d) (66.09 %)                                                                           | 19.52 | -18.66 | 5.56 | 25.08 | -754.2  |
| CAM-B3LYP/6-31+G(d) (27.22 %)                                                                       | 20.41 | -16.23 | 4.85 | 25.66 | -911.4  |
| PBE0/6-31+G(d) (40.53 %)                                                                            | 18.42 | -15.50 | 4.62 | 23.05 | -583.2  |
| APFD/6-31+G(d) (30.51 %)                                                                            | 15.66 | -13.73 | 4.09 | 19.75 | -537.1  |
| $\omega$ B97XD/6-31+G(d) (17.12 %)                                                                  | 20.61 | -13.92 | 4.15 | 24.76 | -696.4  |
| M06-2X/6-31+G(d) (47.96%)                                                                           | 23.14 | -13.63 | 4.06 | 27.20 | -748.3  |
| B3LYP/6-31+G(d) with GD3BJ(38.19 %)                                                                 | 17.16 | -14.70 | 4.38 | 21.54 | -698.9  |
| CAM-B3LYP/6-31+G(d) with GD3BJ (37.37 %)                                                            | 19.36 | -14.28 | 4.25 | 23.62 | -880.5  |
| PBE0/6-31+G(d) with GD3BJ (38.75 %)                                                                 | 17.14 | -14.58 | 4.34 | 21.48 | -548.40 |
| <b>Phloroglucinol complex with 4H<sub>2</sub>O (conformation "in-out")</b>                          |       |        |      |       |         |
| B3LYP/6-31+G(d) (0.03%)                                                                             | 18.60 | -18.46 | 5.50 | 24.10 | -318.1  |
| ketone                                                                                              | 16.63 | -17.77 | 5.30 | 21.93 |         |
| CAM-B3LYP/6-31+G(d) (0.06%)                                                                         | 19.25 | -18.29 | 5.45 | 24.71 | -479.7  |
| ketone                                                                                              | 16.64 | -16.07 | 4.79 | 21.43 |         |
| PBE0/6-31+G(d) (0.11%)                                                                              | 17.75 | -19.77 | 5.89 | 23.64 | -208.4  |
| ketone                                                                                              | 14.87 | -13.40 | 3.99 | 18.87 |         |
| APFD/6-31+G(d) (2.30%)                                                                              | 23.73 | -0.22  | 0.07 | 23.79 | -157.61 |
| ketone                                                                                              | 18.37 | -0.92  | 0.27 | 18.64 |         |
| $\omega$ B97XD/6-31+G(d) (0.92%)                                                                    | 27.52 | -1.35  | 0.40 | 27.92 | -278.2  |
| ketone                                                                                              | 22.19 | -1.49  | 0.45 | 22.64 |         |
| M06-2X/6-31+G(d) (2.58%)                                                                            | 30.91 | -0.72  | 0.40 | 31.12 | -433.6  |
| ketone                                                                                              | 22.42 | -1.01  | 0.45 | 22.72 |         |
| B3LYP/6-31+G(d) with GD3BJ (0.02%)                                                                  | 17.14 | -16.20 | 4.83 | 21.97 | -235.7  |
| ketone                                                                                              | 19.51 | -1.56  | 0.47 | 19.98 |         |
| CAM-B3LYP/6-31+G(d) with GD3BJ (1.75 %)                                                             | 25.74 | -5.61  | 1.67 | 27.41 | -430.5  |
| ketone                                                                                              | 16.43 | -11.41 | 3.40 | 19.83 |         |
| PBE0/6-31+G(d) with GD3BJ (1.75%)                                                                   | 24.18 | -4.22  | 1.26 | 25.44 | -167.2  |
| ketone                                                                                              | 14.66 | -11.23 | 3.35 | 18.01 |         |

| Phloroglucinol complex with 4H <sub>2</sub> O (conformation “in-in”)   |       |        |      |       |        |
|------------------------------------------------------------------------|-------|--------|------|-------|--------|
| B3LYP/6-31+G(d) (8.64 %)                                               | 18.48 | -11.69 | 3.48 | 21.96 | -758.4 |
| ketone                                                                 | 14.07 | -11.80 | 3.52 | 17.58 |        |
| CAM-B3LYP/6-31+G(d) (5.64 %)                                           | 19.22 | -11.00 | 3.28 | 22.50 | -940.8 |
| ketone                                                                 | 13.89 | -10.39 | 3.10 | 16.99 |        |
| PBE0/6-31+G(d) (4.51%)                                                 | 17.22 | -11.20 | 3.34 | 20.55 | -613.0 |
| ketone                                                                 | 12.03 | -10.86 | 3.24 | 15.26 |        |
| APFD/6-31+G(d) (8.02%)                                                 | 14.56 | -11.63 | 3.47 | 18.03 | -605.3 |
| ketone                                                                 | 10.23 | -10.27 | 3.06 | 13.29 |        |
| $\omega$ B97XD/6-31+G(d) (7.40%)                                       | 19.44 | -11.98 | 3.57 | 23.01 | -784.1 |
| ketone                                                                 | 14.85 | -10.97 | 3.27 | 18.12 |        |
| M06-2X/6-31+G(d) (16.85%)                                              | 21.98 | -11.99 | 3.57 | 25.56 | -817.1 |
| ketone                                                                 | 13.56 | -12.03 | 3.59 | 17.15 |        |
| B3LYP/6-31+G(d) with GD3BJ (22.03%)                                    | 16.13 | -14.30 | 4.26 | 20.39 | -757.4 |
| ketone                                                                 | 12.23 | -11.24 | 3.35 | 15.58 |        |
| CAM-B3LYP/6-31+G(d) with GD3BJ (4.04%)                                 | 18.12 | -10.76 | 3.21 | 21.33 | -927.8 |
| Ketone                                                                 | 13.09 | -10.47 | 3.12 | 16.21 |        |
| PBE0/6-31+G(d) with GD3BJ                                              | 15.97 | -11.95 | 3.56 | 19.53 | -603.7 |
| ketone(4.56%)                                                          | 11.10 | -10.96 | 3.27 | 14.37 |        |
| Phloroglucinol complex with 4H <sub>2</sub> O (conformation “in-in A”) |       |        |      |       |        |
| B3LYP/6-31+G(d) (91.10%)                                               | 19.47 | -12.49 | 3.72 | 23.19 | -651.1 |
| ketone                                                                 | 16.75 | -10.10 | 2.91 | 19.73 |        |
| CAM-B3LYP/6-31+G(d) (94.30%)                                           | 20.15 | -12.36 | 3.69 | 23.84 | -846.5 |
| ketone                                                                 | 16.95 | -9.02  | 2.69 | 19.64 |        |
| PBE0/6-31+G(d) (95.38%)                                                | 18.27 | -12.57 | 3.75 | 22.02 | -507.4 |
| ketone                                                                 | 14.90 | -9.33  | 2.78 | 17.68 |        |
| APFD/6-31+G(d) (89.68%)                                                | 15.55 | -10.67 | 3.18 | 18.73 | -520.4 |
| ketone                                                                 | 13.49 | -9.17  | 2.73 | 16.23 |        |
| $\omega$ B97XD/6-31+G(d) (91.69%)                                      | 20.53 | -12.04 | 3.59 | 24.12 | -670.4 |
| ketone                                                                 | 17.60 | -9.012 | 2.69 | 20.29 |        |
| M06-2X/6-31+G(d) (80.56%)                                              | 22.62 | -11.29 | 3.37 | 25.99 | -768.4 |
| ketone                                                                 | 16.34 | -10.32 | 3.08 | 19.42 |        |
| B3LYP/6-31+G(d) with GD3BJ (77.95%)                                    | 17.13 | -12.13 | 3.62 | 20.75 | -643.1 |
| ketone                                                                 | 15.23 | -8.60  | 2.56 | 17.80 |        |
| CAM-B3LYP/6-31+G(d) with GD3BJ (91.28%)                                | 19.11 | -11.77 | 3.51 | 20.62 | -835.4 |
| Ketone                                                                 | 16.28 | -8.55  | 2.55 | 18.82 |        |
| PBE0/6-31+G(d) with GD3BJ                                              | 17.04 | -12.77 | 3.81 | 20.85 | -500.4 |
| ketone(93.68%)                                                         | 14.13 | -9.06  | 2.70 | 16.83 |        |

**Table S2:** Computed activation enthalpy ( $\Delta H_{comp}^{\ddagger}$ ), entropy difference between *TS* and complexes ( $\Delta S_{(TS-R)}$ ), activation entropy ( $-T\Delta S_{comp}^{\ddagger}$ ) and equilibrium Gibbs energies ( $\Delta G_{comp}^{\ddagger}$ ), for taxifolin for various molecular solvation species with a variety of computational methods in continuum (IEFPCM=water)

| Calculation method | Taxifolin (IEFPCM=water) |                                                     |                                           |                                                |                                                | Imaginary frequency cm <sup>-1</sup> |
|--------------------|--------------------------|-----------------------------------------------------|-------------------------------------------|------------------------------------------------|------------------------------------------------|--------------------------------------|
|                    | TS at 6 position         | $\Delta H_{comp}^{\ddagger}$ kcal mol <sup>-1</sup> | $\Delta S_{(TS-R)}$ cal mol <sup>-1</sup> | $-T\Delta S^{\ddagger}$ kcal mol <sup>-1</sup> | $-T\Delta S^{\ddagger}$ kcal mol <sup>-1</sup> |                                      |
| B3LYP/6-31+G(d)    | 6 enone                  | 50.78                                               | -3.13                                     | 0.93                                           | 51.71                                          |                                      |
|                    | TS at 6 position         | 58.11                                               | -0.90                                     | 0.27                                           | 58.38                                          | -2086.5                              |

|                                              |                  |        |        |       |       |         |
|----------------------------------------------|------------------|--------|--------|-------|-------|---------|
|                                              | TS at 8 position | 58.82  | -0.86  | 0.26  | 59.08 | -2091.8 |
|                                              | 8 enone          | 51.22  | -3.54  | 1.06  | 52.28 |         |
| Taxifolin (IEFPCM=water)                     |                  |        |        |       |       |         |
| M06-2X/6-31+G(d)                             | TS at 6 position | 62.80  | -1.92  | 0.57  | 63.37 | -2099.7 |
|                                              | 6 enone          | 52.04  | -2.81  | 0.84  | 52.88 |         |
|                                              | TS at 8 position | 63.70  | -1.43  | 0.43  | 64.13 | -2101.3 |
|                                              | 8 enone          | 52.52  | -3.78  | 1.13  | 53.65 |         |
| Taxifolin + H <sub>2</sub> O (IEFPCM=water)  |                  |        |        |       |       |         |
| B3LYP/6-31+G(d)                              | TS at 6 position | 32.76  | -9.01  | 2.69  | 35.44 |         |
|                                              | 6 enone          | 23.25  | -14.90 | 4.44  | 27.70 | -1272.9 |
|                                              | TS at 8 position | 34.36  | -5.912 | 1.76  | 36.13 |         |
|                                              | 8 enone          | 23.74  | -14.46 | 4.31  | 28.05 | -1296.1 |
| Taxifolin + H <sub>2</sub> O (IEFPCM=water)  |                  |        |        |       |       |         |
| M06-2X/6-31+G(d)                             | TS at 6 position | 33.65  | -7.05  | 2.10  | 35.75 | -1132.6 |
|                                              | 6 enone          | 20.13  | -9.07  | 2.71  | 22.84 |         |
|                                              | TS at 8 position | 29.103 | -5.34  | 1.59  | 35.94 | -1155.7 |
|                                              | 8 enone          | 20.63  | -10.40 | 3.10  | 23.73 |         |
| Taxifolin + 2H <sub>2</sub> O (IEFPCM=water) |                  |        |        |       |       |         |
| B3LYP/6-31+G(d)                              | TS at 6 position | 20.16  | -17.91 | 5.34  | 25.50 | -1039.4 |
|                                              | 6 enone          | 13.00  | -12.37 | 3.69  | 16.69 |         |
|                                              | TS at 8 position | 20.73  | -19.07 | 5.69  | 26.41 | -1089.0 |
|                                              | 8 enone          | 13.39  | -18.61 | 5.55  | 18.94 |         |
| Taxifolin + 2H <sub>2</sub> O (IEFPCM=water) |                  |        |        |       |       |         |
| M06-2X/6-31+G(d)                             | TS at 6 position | 20.73  | -11.85 | 3.53  | 24.26 | -1175.8 |
|                                              | 6 enone          | 9.98   | -10.72 | 3.20  | 13.17 |         |
|                                              | TS at 8 position | 21.45  | -9.922 | 2.96  | 24.41 | -1194.3 |
|                                              | 8 enone          | 10.42  | -13.17 | 3.93  | 14.34 |         |
| Taxifolin + 2H <sub>2</sub> O (IEFPCM=water) |                  |        |        |       |       |         |
| B3LYP/6-31+G(d) with GD3BJ                   | TS at 6 position | 19.03  | -5.96  | 1.78  | 20.81 | -1155.4 |
|                                              | 6 enone          | 11.28  | -11.15 | 3.33  | 14.61 |         |
|                                              | TS at 8 position | 17.81  | -13.79 | 4.123 | 21.93 | -1214.7 |
|                                              | 8 enone          | 11.66  | -9.11  | 2.72  | 14.37 |         |
| Taxifolin + 2H <sub>2</sub> O (IEFPCM=water) |                  |        |        |       |       |         |
| APFD/6-31+G(d)                               | TS at 6 position | 15.73  | -15.73 | 5.06  | 20.79 | -1047.9 |
|                                              | 6 enone          | 8.95   | -12.65 | 3.77  | 12.72 |         |
|                                              | TS at 8 position | 16.31  | -14.96 | 4.46  | 20.77 | -1089.8 |
|                                              | 8 enone          | 9.03   | -12.44 | 3.71  | 12.74 |         |
| Taxifolin + 2H <sub>2</sub> O (IEFPCM=water) |                  |        |        |       |       |         |
| wB97XD/6-31+G(d)                             | TS at 6 position | 20.14  | -16.55 | 4.93  | 25.08 | -1049.0 |
|                                              | 6 enone          | 13.03  | -11.60 | 3.46  | 16.49 |         |
|                                              | TS at 8 position | 20.47  | -12.48 | 3.72  | 24.19 | -1117.9 |
|                                              | 8 enone          | 13.43  | -11.89 | 3.54  | 16.97 |         |
| Taxifolin + 2H <sub>2</sub> O (IEFPCM=water) |                  |        |        |       |       |         |
| PBE0/6-31+G(d)                               | TS at 6 position | 17.82  | -14.46 | 4.31  | 22.13 | -1041.6 |
|                                              | 6 enone          | 9.91   | -11.25 | 3.35  | 13.27 |         |
|                                              | TS at 8 position | 18.56  | -14.48 | 4.32  | 22.88 | -1092.5 |
|                                              | 8 enone          | 10.29  | -11.39 | 3.39  | 13.68 |         |
| Taxifolin + 2H <sub>2</sub> O (IEFPCM=water) |                  |        |        |       |       |         |
| PBE0/6-31+G(d) with GD3BJ                    | TS at 6 position | 16.59  | -14.13 | 4.21  | 20.80 | -1137.8 |
|                                              | 6 enone          | 9.08   | -11.00 | 3.28  | 12.36 |         |
|                                              | TS at 8 position | 17.34  | -13.21 | 3.94  | 21.28 | -1095.6 |
|                                              | 8 enone          | 9.37   | -9.67  | 2.884 | 12.24 |         |
| Taxifolin + 2H <sub>2</sub> O (IEFPCM=water) |                  |        |        |       |       |         |
| CAM-B3LYP/6-31+G(d)                          | TS at 6 position | 20.57  | -14.08 | 4.20  | 24.78 | -1140.9 |
|                                              | 6 enone          | 13.12  | -11.95 | 3.56  | 16.68 |         |

|                                              |                                              |       |        |         |       |          |
|----------------------------------------------|----------------------------------------------|-------|--------|---------|-------|----------|
|                                              | TS_at 8_position                             | 21.29 | -14.67 | 4.38    | 25.67 | -1188.7  |
|                                              | 8_enone                                      | 13.55 | -11.91 | 3.55    | 17.10 |          |
| Taxifolin + 2H <sub>2</sub> O (IEFPCM=water) |                                              |       |        |         |       |          |
| CAM-B3LYP/6-31+G(d) with GD3BJ               | TS_at 6_position                             | 19.44 | -10.92 | 3.26    | 22.69 | -1209.7  |
|                                              | 6_enone                                      | 12.32 | -10.07 | 3.00    | 15.33 |          |
|                                              | TS_at 8_position                             | 20.14 | -11.58 | 3.45    | 23.59 | -1263.4  |
|                                              | 8_enone                                      | 12.65 | -9.65  | 2.97    | 15.61 |          |
| Taxifolin + 3H <sub>2</sub> O (IEFPCM=water) |                                              |       |        |         |       |          |
| B3LYP/6-31+G(d)                              | TS_at 6_position                             | 25.12 | -8.11  | 2.42    | 27.54 | -1030.7  |
|                                              | TS_at 6_position                             | 24.13 | -12.22 | 3.64    | 27.77 |          |
|                                              | TS_at 8_position                             | 25.83 | -7.13  | 2.13    | 27.95 | -1022.0  |
|                                              | Taxifolin + 3H <sub>2</sub> O (IEFPCM=water) |       |        |         |       |          |
| M06-2X/6-31+G(d)                             | TS_at 6_position                             | 25.34 | -9.57  | 2.85    | 28.20 | -1222.4  |
|                                              | TS_at 6_position                             | 24.16 | -9.38  | 2.80    | 26.96 |          |
|                                              | TS_at 8_position                             | 26.06 | -7.38  | 2.20    | 28.26 | -1241.7  |
|                                              | Taxifolin + 3H <sub>2</sub> O (IEFPCM=water) |       |        |         |       |          |
| B3LYP/6-31+G(d) with GD3BJ                   | TS_at 6_position                             | 22.72 | -9.76  | 2.91    | 25.63 | -1094.4  |
|                                              | TS_at 6_position                             | 21.59 | -15.87 | 4.73    | 25.32 |          |
|                                              | TS_at 8_position                             | 23.53 | -6.09  | 1.82    | 24.72 | -1113.5  |
|                                              | Taxifolin + 3H <sub>2</sub> O (IEFPCM=water) |       |        |         |       |          |
| APFD/6-31+G(d)                               | TS_at 6_position                             | 20.74 | -7.51  | 2.234   | 22.98 | -1043.8  |
|                                              | TS_at 6_position                             | 19.40 | -10.66 | 3.18    | 22.58 |          |
|                                              | TS_at 8_position                             | 21.62 | -6.46  | 1.93    | 23.55 | -1076.6  |
|                                              | Taxifolin + 3H <sub>2</sub> O (IEFPCM=water) |       |        |         |       |          |
| wB97XD/6-31+G(d)                             | TS_at 6_position                             | 25.06 | -7.79  | 2.32    | 27.38 | -1005.9  |
|                                              | TS_at 6_position                             | 23.89 | -9.66  | 2.88    | 26.77 |          |
|                                              | TS_at 8_position                             | 25.77 | -5.37  | 1.60    | 27.37 | -1032.4  |
|                                              | Taxifolin + 3H <sub>2</sub> O (IEFPCM=water) |       |        |         |       |          |
| PBE0/6-31+G(d)                               | TS_at 6_position                             | 23.06 | -9.85  | 2.94    | 26.00 | -1036.7  |
|                                              | TS_at 6_position                             | 21.83 | -10.33 | 3.08    | 24.91 |          |
|                                              | TS_at 8_position                             | 23.80 | -8.45  | 2.52    | 26.32 | -1046.5  |
|                                              | Taxifolin + 3H <sub>2</sub> O (IEFPCM=water) |       |        |         |       |          |
| PBE0/6-31+G(d) with GD3BJ                    | TS_at 6_position                             | 20.45 | -15.85 | 4.73    | 25.18 | -1116.1  |
|                                              | TS_at 6_position                             | 21.69 | -7.86  | 2.34    | 24.03 |          |
|                                              | TS_at 8_position                             | 22.60 | -13.45 | 4.01    | 24.67 | -1146.50 |
|                                              | Taxifolin + 3H <sub>2</sub> O (IEFPCM=water) |       |        |         |       |          |
| CAM-B3LYP/6-31+G(d)                          | TS_at 6_position                             | 25.78 | -11.22 | 3.34    | 29.12 | -1120.3  |
|                                              | TS_at 6_position                             | 24.68 | -11.10 | 3.31    | 27.99 |          |
|                                              | TS_at 8_position                             | 26.52 | -7.68  | 2.291   | 28.81 | -1137.1  |
|                                              | Taxifolin + 3H <sub>2</sub> O (IEFPCM=water) |       |        |         |       |          |
| CAM-B3LYP/6-31+G(d) with GD3BJ               | TS_at 6_position                             | 24.51 | -9.23  | 2.75    | 27.26 | -1166.8  |
|                                              | TS_at 6_position                             | 23.45 | -12.07 | 3.60    | 27.05 |          |
|                                              | TS_at 8_position                             | 25.42 | -7.52  | 2.24    | 27.66 | -1189.6  |
| Taxifolin + 4H <sub>2</sub> O (IEFPCM=water) |                                              |       |        |         |       |          |
| B3LYP/6-31+G(d)                              | TS_at 6_position                             | 24.08 | 4.21   | -1.2550 | 22.82 | -1077.96 |

|                                |                                                 |       |        |        |       |          |
|--------------------------------|-------------------------------------------------|-------|--------|--------|-------|----------|
|                                | TS_at 8_position                                | 26.51 | -2.740 | 0.806  | 27.32 | -1051.77 |
|                                | TS_at 8_position                                | 24.18 | 0.849  | -0.253 | 23.93 | -1051.77 |
|                                | Taxifolin + 4H <sub>2</sub> O<br>(IEFPCM=water) |       |        |        |       |          |
| M06-2X/6-31+G(d)               | TS_at 6_position                                | 25.34 | -9.57  | 2.85   | 28.20 | -1222.4  |
|                                | TS_at 6_position                                | 24.16 | -9.38  | 2.80   | 26.96 |          |
|                                | TS_at 8_position                                | 26.06 | -7.38  | 2.20   | 28.26 | -1241.7  |
|                                | Taxifolin + 3H <sub>2</sub> O<br>(IEFPCM=water) |       |        |        |       |          |
| B3LYP/6-31+G(d) with GD3BJ     | TS_at 6_position                                | 22.87 | 3.889  | -1.160 | 21.71 | -1201.71 |
|                                | TS_at 8_position                                | 24.22 | 1.539  | -0.459 | 23.76 | -1201.64 |
| A                              | TS_at 8_position                                | 23.66 | 2.147  | -0.640 | 23.02 | -1201.64 |
| B                              | Taxifolin + 4H <sub>2</sub> O<br>(IEFPCM=water) |       |        |        |       |          |
| APFD/6-31+G(d)                 | TS_at 6_position                                | 20.95 | 3.54   | -1.055 | 19.89 | -1068.46 |
| A                              | TS_at 8_position                                | 22.06 | -3.173 | 0.946  | 23.00 | -1068.60 |
| B                              | TS_at 8_position                                | 21.57 | 4.483  | -1.337 | 20.23 | -1068.60 |
|                                | Taxifolin + 3H <sub>2</sub> O<br>(IEFPCM=water) |       |        |        |       |          |
| wB97XD/6-31+G(d)               | TS_at 6_position                                | 25.14 | 3.532  | -1.053 | 24.08 | -1082.11 |
| A                              | TS_at 6_position                                | 25.96 | -7.971 | 2.377  | 28.33 | -1084.27 |
| B                              | TS_at 8_position                                | 25.97 | 1.474  | -0.439 | 25.53 | -1084.27 |
|                                | Taxifolin + 4H <sub>2</sub> O<br>(IEFPCM=water) |       |        |        |       |          |
| PBE0/6-31+G(d)                 | TS_at 6_position                                | 22.41 | 3.505  | -1.045 | 21.37 | -1065.26 |
| A                              | TS_at 8_position                                | 24.86 | -4.418 | 1.317  | 26.17 | -1062.98 |
| B                              | TS_at 8_position                                | 22.63 | 0.909  | -0.271 | 22.36 | -1062.98 |
|                                | Taxifolin + 4H <sub>2</sub> O<br>(IEFPCM=water) |       |        |        |       |          |
| PBE0/6-31+G(d) with GD3BJ      | TS_at 6_position                                | 21.78 | 2.76   | -0.823 | 20.96 | -1177.43 |
| A                              | TS_at 6_position                                | 23.19 | -5.14  | 1.532  | 24.72 | -1177.32 |
| B                              | TS_at 8_position                                | 22.52 | 2.76   | -0.823 | 22.17 | -1177.32 |
|                                | Taxifolin + 4H <sub>2</sub> O<br>(IEFPCM=water) |       |        |        |       |          |
| CAM-B3LYP/6-31+G(d)            | TS_at 6_position                                | 25.31 | 4.49   | -1.339 | 23.97 | -1168.34 |
| A                              | TS_at 8_position                                | 27.33 | -3.21  | 0.957  | 28.28 | -1161.98 |
| B                              | TS_at 8_position                                | 25.32 | 1.364  | -0.407 | 24.91 | -1161.98 |
|                                | Taxifolin + 4H <sub>2</sub> O<br>(IEFPCM=water) |       |        |        |       |          |
| CAM-B3LYP/6-31+G(d) with GD3BJ | TS_at 6_position                                | 24.78 | 3.456  | -1.030 | 23.75 | -1241.54 |
| A                              | TS_at 8_position                                | 25.80 | -6.702 | 1.998  | 27.80 | -1242.46 |
| B                              | TS_at 8_position                                | 23.45 | 1.135  | -0.338 | 25.11 | -1242.46 |

**Table S3** Computed activation enthalpy ( $\Delta H_{comp}^{\ddagger}$ ), activation entropy ( $-T\Delta S_{comp}^{\ddagger}$ ) and Gibbs activation energy ( $\Delta G^{\ddagger}$ ) for phloroglucinol anion for various molecular water solvation species and computational methods.

| Calculation method                                                                  | $\Delta H_{comp}^{\ddagger}$<br>kcal mol <sup>-1</sup> | $\Delta S_{comp}^{\ddagger}$<br>cal mol <sup>-1</sup> | $-T\Delta S_{comp}^{\ddagger}$<br>kcal mol <sup>-1</sup> | $\Delta G_{comp}^{\ddagger}$<br>kcal mol <sup>-1</sup> | <i>imaginary</i> |
|-------------------------------------------------------------------------------------|--------------------------------------------------------|-------------------------------------------------------|----------------------------------------------------------|--------------------------------------------------------|------------------|
| <b>Phloroglucinol anion complex with 2H<sub>2</sub>O (one H<sub>2</sub>O on OH)</b> |                                                        |                                                       |                                                          |                                                        |                  |
| B3LYP/6-31+G(d) (0.16 %)                                                            | <b>11.04</b>                                           | <b>-8.94</b>                                          | <b>2.67</b>                                              | <b>13.70</b>                                           | <b>-1027.7</b>   |
| CAM-B3LYP/6-31+G(d) (0.32 %)                                                        | <b>11.89</b>                                           | <b>-8.39</b>                                          | <b>2.50</b>                                              | <b>14.39</b>                                           | <b>-1144.1</b>   |
| PBE0/6-31+G(d)                                                                      | <b>10.79</b>                                           | <b>-8.43</b>                                          | <b>2.51</b>                                              | <b>13.30</b>                                           | <b>-817.8</b>    |



|                                                                                          |       |        |      |       |          |
|------------------------------------------------------------------------------------------|-------|--------|------|-------|----------|
| APFD/6-31+G(d)                                                                           | 9.84  | -6.70  | 2.00 | 11.83 | -788.3   |
| $\omega$ B97XD/6-31+G(d) (0.37%)                                                         | 12.90 | -7.73  | 2.31 | 15.21 | -996.4   |
| $\omega$ B97XD/aug-cc-pVDZ (0.22 %)                                                      | 13.74 | -8.39  | 2.50 | 16.24 | -854.5   |
| M06-2X/6-31+G(d) (0.39 %)                                                                | 14.93 | -9.74  | 2.91 | 17.83 | -975.4   |
| B3LYP/6-31+G(d) with GD3BJ (0.26 %)                                                      | 10.64 | -7.94  | 2.37 | 13.01 | -979.5   |
| CAM B3LYP/6-31+G(d) with GD3BJ (0.30 %)                                                  | 11.77 | -7.76  | 2.31 | 14.08 | -1117.6  |
| PBE0/6-31+G(d) with GD3BJ                                                                | 10.68 | -7.97  | 2.38 | 13.05 | -782.6   |
| <b>Phloroglucinol anion complex with 2H<sub>2</sub>O (1 H<sub>2</sub>O on C=O (B))</b>   |       |        |      |       |          |
| B3LYP/6-31+G(d) (55.21 %)                                                                | 17.11 | -9.65  | 2.88 | 19.99 | -366.3   |
| CAM-B3LYP/6-31+G(d) (38.73 %)                                                            | 17.95 | -8.62  | 2.57 | 20.58 | -536.4   |
| PBE0/6-31+G(d)                                                                           | a     | a      | a    | a     | a        |
| APFD/6-31+G(d)                                                                           | a     | a      | a    | a     | a        |
| $\omega$ B97XD/6-31+G(d) (57.92 %)                                                       | 18.76 | -8.76  | 2.61 | 21.37 | -388.0   |
| $\omega$ B97XD/aug-cc-pVDZ (62.72 %)                                                     | 20.96 | -8.926 | 2.66 | 23.62 | -216.0   |
| M06-2X/6-31+G(d) (72.33 %)                                                               | 22.68 | -8.22  | 2.45 | 25.13 | -239.4   |
| B3LYP/6-31+G(d) with GD3BJ (65.89 %)                                                     | 17.28 | -8.65  | 2.58 | 19.86 | -239.2   |
| CAM B3LYP/6-31+G(d) with GD3BJ (60.20 %)                                                 | 18.02 | -8.02  | 2.39 | 20.47 | -476.5   |
| PBE0/6-31+G(d) with GD3BJ                                                                | a     | a      | a    | a     | a        |
| <b>Phloroglucinol anion complex with 2H<sub>2</sub>O (one H<sub>2</sub>O on C=O (A))</b> |       |        |      |       |          |
| B3LYP/6-31+G(d) (44.62 %)                                                                | 17.62 | -9.73  | 2.90 | 20.52 | -296.2   |
| CAM B3LYP/6-31+G(d) (60.95 %)                                                            | 18.42 | -10.96 | 3.27 | 21.69 | -1344.4  |
| PBE0/6-31+G(d)                                                                           | 17.00 | -10.46 | 3.12 | 20.11 | -1177.1  |
| APFD/6-31+G(d)                                                                           | 16.32 | -9.48  | 2.83 | 19.15 | -1159.9  |
| $\omega$ B97XD/6-31+G(d) (41.71 %)                                                       | 19.14 | -10.12 | 3.02 | 22.16 | -1283.2  |
| $\omega$ B97XD/aug-cc-pVDZ (37.05 %)                                                     | 20.19 | -9.69  | 2.89 | 23.08 | -1209.8  |
| M06-2X/6-31+G(d) (27.27 %)                                                               | 20.22 | -13.06 | 3.89 | 24.12 | -1263.22 |
| B3LYP/6-31+G(d) with GD3BJ (33.85 %)                                                     | 17.12 | -9.37  | 2.79 | 19.91 | -1206.6  |
| CAM B3LYP/6-31+G(d) with GD3BJ (39.49 %)                                                 | 18.28 | -8.80  | 2.62 | 21.32 | -1327.5  |
| PBE0/6-31+G(d) with GD3BJ                                                                | 16.79 | -9.79  | 2.92 | 19.71 | -1156.4  |
| <b>Phloroglucinol anion complex with 3H<sub>2</sub>O</b>                                 |       |        |      |       |          |
| B3LYP/6-31+G(d)                                                                          | 10.10 | -9.40  | 2.80 | 12.90 | -1252.6  |
| CAM-B3LYP/6-31+G(d)                                                                      | 10.97 | -8.01  | 2.39 | 13.36 | -1258.6  |
| PBE0/6-31+G(d)                                                                           | 9.60  | -7.40  | 2.21 | 11.80 | -1007.0  |
| APFD/6-31+G(d)                                                                           | 9.08  | -7.29  | 2.18 | 11.26 | -937.7   |
| $\omega$ B97XD/6-31+G(d)                                                                 | 11.70 | -7.95  | 2.37 | 14.07 | -1148.7  |
| M06-2X/6-31+G(d)                                                                         | 14.20 | -7.65  | 2.28 | 16.47 | -1055.1  |
| B3LYP/6-31+G(d) with GD3BJ                                                               | 9.58  | -6.86  | 2.05 | 11.63 | -1125.5  |
| CAM-B3LYP/6-31+G(d) with GD3BJ                                                           | 10.81 | -7.17  | 2.14 | 12.95 | -1231.9  |
| PBE0/6-31+G(d) with GD3BJ                                                                | 9.46  | -6.75  | 2.21 | 11.48 | -970.8   |
| <b>Phloroglucinol anion complex with 4H<sub>2</sub>O</b>                                 |       |        |      |       |          |
| B3LYP/6-31+G(d)                                                                          | 11.82 | -14.04 | 4.19 | 16.01 | -1102.1  |
| CAM-B3LYP/6-31+G(d)                                                                      | 10.81 | -7.17  | 2.14 | 12.95 | -1197.5  |
| PBE0/6-31+G(d)                                                                           | 11.00 | -15.72 | 4.69 | 15.68 | -922.3   |
| APFD/6-31+G(d)                                                                           | 10.20 | -14.41 | 4.30 | 14.49 | -853.7   |
| $\omega$ B97XD/6-31+G(d)                                                                 | 12.69 | -12.00 | 3.58 | 16.27 | -1071.0  |
| M06-2X/6-31+G(d)                                                                         | 15.25 | -8.26  | 2.46 | 17.71 | -982.6   |
| B3LYP/6-31+G(d) with GD3BJ                                                               | 10.79 | -14.31 | 4.27 | 15.06 | -1038.5  |
| CAM-B3LYP/6-31+G(d) with GD3BJ                                                           | 12.07 | -13.04 | 3.89 | 15.96 | -1167.5  |
| PBE0/6-31+G(d) with GD3BJ                                                                | 10.57 | -13.31 | 3.97 | 14.53 | -871.6   |

<sup>a</sup> A transition state could not be determined.

**Table S4** Computed activation enthalpy ( $\Delta H_{comp}^{\ddagger}$ ), entropy difference between *TS* and complexes ( $\Delta S_{(TS-R)}$ ), activation entropy ( $-T\Delta S_{comp}^{\ddagger}$ ) and equilibrium Gibbs energies ( $\Delta G_{comp}^{\ddagger}$ ), for the C(6)-H of ionic taxifolin with three water molecules, with a variety of computational methods in continuum (IEFPCM=water)

| Calculation method                                             | $\Delta H_{comp}^{\ddagger}$<br><i>kcal mol<sup>-1</sup></i> | $\Delta S_{comp}^{\ddagger}$<br><i>cal mol<sup>-1</sup></i> | $-T\Delta S_{comp}^{\ddagger}$<br><i>kcal mol<sup>-1</sup></i> | $\Delta G_{comp}^{\ddagger}$<br><i>kcal mol<sup>-1</sup></i> | <i>Imaginary</i><br><i>cm<sup>-1</sup></i> |
|----------------------------------------------------------------|--------------------------------------------------------------|-------------------------------------------------------------|----------------------------------------------------------------|--------------------------------------------------------------|--------------------------------------------|
| <b>Ionic Taxifolin + 3H<sub>2</sub>O (IEFPCM=water) C(6)-H</b> |                                                              |                                                             |                                                                |                                                              |                                            |
| <b>B3LYP-D/6-31+G(d)</b>                                       | 22.27                                                        | 5.23                                                        | 1.56                                                           | 23.83                                                        | -1014.38                                   |
| <b>PBE-D/6-31+G(d)</b>                                         | 23.06                                                        | 5.71                                                        | 1.70                                                           | 24.76                                                        | -736.08                                    |
| <b>ωB97X-D/6-31+G(d)</b>                                       | 23.56                                                        | 3.18                                                        | 0.95                                                           | 24.51                                                        | -940.37                                    |
| <b>CAM-B3LYP-D/6-31+G(d)</b>                                   | 22.17                                                        | 4.29                                                        | 1.27                                                           | 23.44                                                        | -907.14                                    |

### Ionic taxifolin +3H<sub>2</sub>O

#### Cartesian Coordinates

#### Geometries of minimized structures and transition states

#### Minimized

#### Taxifolin\_anion\_3H2O\_at C6 wB97XD\_631G+d\_water

-1 1

```

C      -0.12673500  -0.36853000  -0.72042200
C      -0.76810200   0.83057200  -0.28037400
C      -2.15407800   0.83939700   0.00548800
H       1.65085500  -1.32464300  -1.40344000
C       1.19289100  -0.39302500  -1.08697500
C       0.03408200   2.01187500  -0.19427500
C       1.99731800   0.79914700  -1.02833900
O      -0.83219300  -1.52862800  -0.80111100
O      -0.52532600   3.16207800   0.23101200
H      -1.47233800   2.97649200   0.43420800
O       3.22577200   0.78754400  -1.35900500
O      -2.79535900   1.82116700   0.44714000
O      -4.07370400  -0.50803400   0.53374400
H      -4.26483100   0.41185000   0.78940300
C      -2.00498800  -1.64201900   0.02093800
H      -1.69153200  -1.60585100   1.07420500

```

|   |             |             |             |
|---|-------------|-------------|-------------|
| C | -2.91599900 | -0.45000200 | -0.26182400 |
| H | -3.18333700 | -0.46203500 | -1.33236900 |
| O | 2.83791500  | -1.94657200 | 1.73337300  |
| H | 2.49444300  | -1.05013700 | 1.94183700  |
| C | -2.64449100 | -2.97668300 | -0.29349700 |
| H | -3.52940100 | -3.11905300 | 0.33254300  |
| H | -2.94632100 | -3.02022500 | -1.34543400 |
| H | -1.94128800 | -3.79001500 | -0.09276400 |
| C | 1.36955000  | 1.99689300  | -0.53405300 |
| H | 3.35837600  | -2.20518800 | 2.50445200  |
| H | 1.95536800  | 2.90912500  | -0.46914600 |
| O | 1.88957300  | 0.61258300  | 2.33146500  |
| H | 2.56261800  | 1.13485500  | 2.78747400  |
| H | 1.71643800  | 1.09322300  | 1.50104200  |
| O | 4.45322000  | -1.56700700 | -0.58560800 |
| H | 4.05089400  | -0.74279900 | -0.94422500 |
| H | 3.92417400  | -1.75640200 | 0.21413100  |

### Transition State

**Taxifolin\_anion\_3H2O\_at C6\_part\_wB97XD\_631G+d\_water.**

**Imaginary Frequency: -940.37 cm<sup>-1</sup>**

-1 1

|   |             |             |             |
|---|-------------|-------------|-------------|
| C | -0.35167600 | -0.65517200 | -0.62235400 |
| C | -0.78179400 | 0.69583900  | -0.30946800 |
| C | -2.14983100 | 0.96918600  | 0.01138000  |
| H | 1.15286000  | -1.96607800 | -1.35835600 |
| C | 0.89106400  | -0.94519100 | -1.10630100 |
| C | 0.13765300  | 1.72742500  | -0.42404000 |
| C | 1.85756000  | 0.09844600  | -1.30604500 |
| O | -1.22635700 | -1.66281200 | -0.47324700 |
| O | -0.19149100 | 2.97615600  | -0.19391400 |
| H | -1.14715100 | 2.99534800  | 0.07482000  |

|   |             |             |             |
|---|-------------|-------------|-------------|
| O | 2.97277600  | -0.10445600 | -1.81394700 |
| O | -2.57540700 | 2.09619400  | 0.31926600  |
| O | -4.23469500 | 0.01744000  | 0.74634200  |
| H | -4.32176600 | 0.97576500  | 0.85645700  |
| C | -2.37653700 | -1.47053700 | 0.37978100  |
| H | -2.01826400 | -1.34256300 | 1.40903000  |
| C | -3.10876800 | -0.20106300 | -0.05851300 |
| H | -3.39591800 | -0.31738100 | -1.11781100 |
| O | 3.26419400  | -0.96799300 | 2.06977900  |
| H | 3.18474700  | 0.21775200  | 1.92796900  |
| C | -3.22138200 | -2.71844600 | 0.26348300  |
| H | -4.09381100 | -2.62971200 | 0.91408600  |
| H | -3.56074800 | -2.85664400 | -0.76717800 |
| H | -2.64455500 | -3.59371800 | 0.57007800  |
| C | 1.54086100  | 1.47068700  | -0.77111700 |
| H | 3.72879800  | -1.14747300 | 2.89175500  |
| H | 1.95484600  | 2.26265600  | -1.39953200 |
| O | 3.04376000  | 1.41425700  | 1.74638900  |
| H | 3.91205100  | 1.79950400  | 1.59500600  |
| H | 2.11825000  | 1.51812200  | 0.20996500  |
| O | 4.28140900  | -2.08414900 | -0.15003400 |
| H | 3.90457900  | -1.52427800 | -0.84581600 |
| H | 3.92966300  | -1.69544100 | 0.69362300  |

## Minimized

### Taxifolin\_anion\_3H2O\_at C6 CAM-B3LYP-D\_631G+d\_water

-1 1

|   |             |             |             |
|---|-------------|-------------|-------------|
| C | -0.18173500 | -0.41656500 | -0.73770100 |
| C | -0.79099500 | 0.79803500  | -0.30049500 |
| C | -2.16538000 | 0.83705700  | 0.01693400  |
| H | 1.56185200  | -1.41213800 | -1.44497600 |
| C | 1.12708000  | -0.47028000 | -1.12937900 |
| C | 0.03170700  | 1.96471700  | -0.24808000 |
| C | 1.95021600  | 0.70803400  | -1.10569500 |
| O | -0.91495100 | -1.56319800 | -0.78757700 |
| O | -0.50558800 | 3.12797700  | 0.17360900  |
| H | -1.45490400 | 2.95528000  | 0.39898900  |
| O | 3.17106900  | 0.67114400  | -1.46516500 |
| O | -2.77679100 | 1.83996600  | 0.45943400  |
| O | -4.09338700 | -0.45338700 | 0.62865700  |
| H | -4.25228200 | 0.47781900  | 0.87716300  |
| C | -2.06980300 | -1.64244300 | 0.06727800  |
| H | -1.72695000 | -1.59777100 | 1.10969700  |
| C | -2.95936700 | -0.43671200 | -0.20680800 |
| H | -3.26357700 | -0.46030700 | -1.26604000 |
| O | 3.12220300  | -1.76201600 | 1.87637400  |
| H | 2.72854300  | -0.87271600 | 2.04018000  |
| C | -2.74369500 | -2.96469800 | -0.21286800 |
| H | -3.61911700 | -3.07786800 | 0.43113200  |
| H | -3.06624800 | -3.01711900 | -1.25762500 |
| H | -2.05539800 | -3.79062800 | -0.01462300 |
| C | 1.35684000  | 1.92248100  | -0.61551900 |
| H | 3.68936200  | -1.94466300 | 2.63979700  |
| H | 1.95829500  | 2.82543500  | -0.58510200 |
| O | 1.98473700  | 0.73104500  | 2.27553200  |
| H | 2.56175700  | 1.34949800  | 2.74895300  |

|   |            |             |             |
|---|------------|-------------|-------------|
| H | 1.78861700 | 1.16050300  | 1.41855500  |
| O | 4.48050800 | -1.57972900 | -0.60294500 |
| H | 4.02953900 | -0.79230700 | -0.99488900 |
| H | 4.04888400 | -1.69518900 | 0.26942800  |

### Transition State

Taxifolin\_anion\_3H2O\_at C6\_part\_ CAM-B3LYP-D\_631G+d\_water

Imaginary Frequency: -907.14 cm<sup>-1</sup>

-1 1

|   |             |             |             |
|---|-------------|-------------|-------------|
| C | -0.36882800 | -0.67087000 | -0.61816800 |
| C | -0.79478200 | 0.68352500  | -0.32023700 |
| C | -2.15939600 | 0.96228000  | -0.00069800 |
| H | 1.13011500  | -1.99517800 | -1.33524500 |
| C | 0.87170600  | -0.97055800 | -1.09471700 |
| C | 0.12837700  | 1.70788100  | -0.44077200 |
| C | 1.84228800  | 0.06496600  | -1.29998800 |
| O | -1.25039000 | -1.67325600 | -0.45888300 |
| O | -0.19467300 | 2.96185000  | -0.22160100 |
| H | -1.15606300 | 2.99281000  | 0.04715400  |
| O | 2.95939100  | -0.14813300 | -1.80075400 |
| O | -2.58312100 | 2.09275000  | 0.29960700  |
| O | -4.24360900 | 0.03866500  | 0.75591300  |
| H | -4.31366200 | 1.00548400  | 0.86240300  |
| C | -2.39849500 | -1.46750400 | 0.39684500  |
| H | -2.03413200 | -1.32887000 | 1.42161600  |
| C | -3.12186000 | -0.20209600 | -0.05441700 |
| H | -3.42116900 | -0.33054300 | -1.10784500 |
| O | 3.33198400  | -0.94278100 | 2.06535700  |
| H | 3.21356400  | 0.23893100  | 1.92986500  |
| C | -3.24769600 | -2.71121100 | 0.29701400  |
| H | -4.12100300 | -2.61190500 | 0.94572300  |
| H | -3.58737900 | -2.86234800 | -0.73218800 |

|   |             |             |             |
|---|-------------|-------------|-------------|
| H | -2.67488000 | -3.58635000 | 0.61374700  |
| C | 1.53098000  | 1.44362500  | -0.78281300 |
| H | 3.81884800  | -1.10197700 | 2.88624900  |
| H | 1.94182000  | 2.22385100  | -1.42892000 |
| O | 3.02604100  | 1.44351200  | 1.74644200  |
| H | 3.88866500  | 1.85346800  | 1.58713700  |
| H | 2.11078000  | 1.51399000  | 0.19175500  |
| O | 4.39340000  | -2.01423100 | -0.16246000 |
| H | 3.96525900  | -1.47617300 | -0.85483600 |
| H | 4.03327500  | -1.64243700 | 0.69212500  |

### Minimized

Taxifolin\_anion\_3H2O\_at C6 B3LYP-D\_631G+d\_water

-1 1

|   |             |             |             |
|---|-------------|-------------|-------------|
| C | -0.16423800 | -0.40484500 | -0.74055900 |
| C | -0.78238900 | 0.80989800  | -0.30033900 |
| C | -2.16110200 | 0.84353300  | 0.01178700  |
| H | 1.59326300  | -1.39265100 | -1.43929500 |
| C | 1.15290800  | -0.45237900 | -1.12481700 |
| C | 0.04101200  | 1.98272300  | -0.23508200 |
| C | 1.97680000  | 0.73027500  | -1.08949000 |
| O | -0.89464100 | -1.56025900 | -0.80263500 |
| O | -0.50366900 | 3.14886200  | 0.19110400  |
| H | -1.45579800 | 2.96580400  | 0.40900700  |
| O | 3.20594900  | 0.69888000  | -1.44052200 |
| O | -2.78112300 | 1.84918900  | 0.45904500  |
| O | -4.10072500 | -0.46022800 | 0.60934700  |
| H | -4.25179900 | 0.47187900  | 0.86725400  |
| C | -2.06194500 | -1.64681700 | 0.05085000  |
| H | -1.72205200 | -1.60634000 | 1.09525800  |
| C | -2.95408400 | -0.43583700 | -0.22269800 |
| H | -3.25514800 | -0.45699000 | -1.28427400 |

|   |             |             |             |
|---|-------------|-------------|-------------|
| O | 3.01055100  | -1.83064600 | 1.85362800  |
| H | 2.64349100  | -0.92830200 | 2.01872800  |
| C | -2.73061100 | -2.97454000 | -0.24127500 |
| H | -3.60732100 | -3.09564500 | 0.40147400  |
| H | -3.05230000 | -3.02160900 | -1.28775300 |
| H | -2.03833800 | -3.79975400 | -0.04677200 |
| C | 1.37340300  | 1.94454200  | -0.59550300 |
| H | 3.57310900  | -2.02310800 | 2.62014700  |
| H | 1.97355800  | 2.84867500  | -0.55337300 |
| O | 1.96293500  | 0.71479400  | 2.29265500  |
| H | 2.60923800  | 1.29573600  | 2.72544400  |
| H | 1.77059200  | 1.14462900  | 1.43246200  |
| O | 4.47949200  | -1.59322300 | -0.57960000 |
| H | 4.04492200  | -0.79358000 | -0.96993400 |
| H | 4.00590500  | -1.72701700 | 0.27020900  |

### Transition State

**Taxifolin\_anion\_3H2O\_at C6\_part\_ B3LYP-D\_631G+d\_water**

**Imaginary Frequency: -1014.38 cm<sup>-1</sup>**

-1 1

|   |             |             |             |
|---|-------------|-------------|-------------|
| C | -0.36533600 | -0.66469900 | -0.62007000 |
| C | -0.78685600 | 0.68987300  | -0.31211200 |
| C | -2.15325800 | 0.97254700  | 0.00712700  |
| H | 1.13321300  | -1.98851700 | -1.35669100 |
| C | 0.88072000  | -0.96413300 | -1.10563500 |
| C | 0.14748200  | 1.71661200  | -0.42949900 |
| C | 1.85597100  | 0.06851800  | -1.30775600 |
| O | -1.24785100 | -1.67491100 | -0.46702000 |
| O | -0.17647500 | 2.97709000  | -0.20717400 |
| H | -1.14099800 | 3.00213900  | 0.06183400  |
| O | 2.97668700  | -0.14406800 | -1.81860200 |
| O | -2.57683600 | 2.10908400  | 0.31605300  |
| O | -4.25867400 | 0.04866000  | 0.74618000  |



|   |             |             |             |
|---|-------------|-------------|-------------|
| H | -4.31113000 | 1.01664500  | 0.86884600  |
| C | -2.40881500 | -1.46947100 | 0.38818700  |
| H | -2.04683300 | -1.34046800 | 1.41569600  |
| C | -3.12409900 | -0.19134500 | -0.05964600 |
| H | -3.41829400 | -0.31266900 | -1.11674700 |
| O | 3.26283100  | -0.97153600 | 2.08958600  |
| H | 3.19626300  | 0.24192200  | 1.92441300  |
| C | -3.26307100 | -2.71388100 | 0.27198500  |
| H | -4.13787000 | -2.61821300 | 0.92112500  |
| H | -3.60239200 | -2.85308500 | -0.76017500 |
| H | -2.69287400 | -3.59490700 | 0.58134300  |
| C | 1.54993900  | 1.44542400  | -0.76708300 |
| H | 3.78763900  | -1.12685500 | 2.89016500  |
| H | 1.98060700  | 2.23779200  | -1.38659700 |
| O | 3.06960600  | 1.43218700  | 1.72632300  |
| H | 3.94379400  | 1.76822700  | 1.47168000  |
| H | 2.12866800  | 1.49047200  | 0.21932900  |
| O | 4.35782700  | -2.03926100 | -0.13623800 |
| H | 3.94770600  | -1.49104200 | -0.83427000 |
| H | 3.97951900  | -1.66605800 | 0.71419800  |

## Minimized

### Taxifolin\_anion\_3H2O\_at C6 PBE-D\_631G+d\_water

-1 1

|   |             |             |             |
|---|-------------|-------------|-------------|
| C | -0.17778400 | -0.42026900 | -0.73088800 |
| C | -0.78683100 | 0.79537700  | -0.29558300 |
| C | -2.16289900 | 0.83557200  | 0.01430600  |
| H | 1.57164200  | -1.41315900 | -1.43796000 |
| C | 1.13422900  | -0.47042200 | -1.12377200 |
| C | 0.03270800  | 1.96582200  | -0.24004000 |
| C | 1.95736900  | 0.70952600  | -1.10160000 |
| O | -0.90637200 | -1.56676400 | -0.77803600 |
| O | -0.51000800 | 3.12284700  | 0.18040600  |
| H | -1.45910100 | 2.93415300  | 0.40117500  |
| O | 3.17631400  | 0.67615500  | -1.46228200 |
| O | -2.77707300 | 1.83796800  | 0.45950200  |
| O | -4.09838000 | -0.44855600 | 0.59519000  |
| H | -4.23648200 | 0.48405900  | 0.85062900  |
| C | -2.06191900 | -1.63684800 | 0.07172300  |
| H | -1.72349600 | -1.57953100 | 1.11723500  |
| C | -2.95360000 | -0.43646800 | -0.21790700 |
| H | -3.23675200 | -0.46614600 | -1.28554800 |
| O | 3.09193900  | -1.76410900 | 1.87454100  |
| H | 2.70526800  | -0.86963100 | 2.02230200  |
| C | -2.73331500 | -2.96116300 | -0.19462000 |
| H | -3.61180300 | -3.06542100 | 0.44831800  |
| H | -3.05344200 | -3.02685300 | -1.24030300 |
| H | -2.04661200 | -3.78633500 | 0.01712500  |
| C | 1.36099600  | 1.92344200  | -0.60739000 |
| H | 3.69126900  | -1.90750400 | 2.61926400  |
| H | 1.96264900  | 2.82785800  | -0.57540200 |
| O | 1.98396900  | 0.74168700  | 2.26308900  |
| H | 2.61218600  | 1.34750400  | 2.68057100  |

|   |            |             |             |
|---|------------|-------------|-------------|
| H | 1.77942700 | 1.14912200  | 1.39739700  |
| O | 4.45925800 | -1.59336600 | -0.59944400 |
| H | 4.01772500 | -0.80232200 | -0.99161700 |
| H | 4.01662100 | -1.70009700 | 0.26771600  |

### Transition State

**Taxifolin\_anion\_3H2O\_at C6\_part\_6\_PBE-D\_631G+d\_water**

**Imaginary Frequency: -736.08 cm<sup>-1</sup>**

-1 1

|   |             |             |             |
|---|-------------|-------------|-------------|
| C | -0.36271500 | -0.66428100 | -0.61599900 |
| C | -0.78859700 | 0.68151900  | -0.30326700 |
| C | -2.15333200 | 0.95757800  | 0.00668300  |
| H | 1.14224500  | -1.97331900 | -1.36215100 |
| C | 0.88243800  | -0.95196100 | -1.10374600 |
| C | 0.13623600  | 1.71483700  | -0.41735200 |
| C | 1.84693600  | 0.08894500  | -1.30157700 |
| O | -1.23571700 | -1.67314500 | -0.46502700 |
| O | -0.20050800 | 2.96277800  | -0.19330100 |
| H | -1.16542000 | 2.96969000  | 0.07281700  |
| O | 2.96239500  | -0.10974800 | -1.81578000 |
| O | -2.58266000 | 2.08603700  | 0.31764500  |
| O | -4.24533100 | 0.02709900  | 0.71914500  |
| H | -4.29210500 | 0.99228900  | 0.84774400  |
| C | -2.38436700 | -1.46957600 | 0.38467200  |
| H | -2.02374100 | -1.32809600 | 1.41252400  |
| C | -3.11140300 | -0.20665800 | -0.06833700 |
| H | -3.38852500 | -0.33391000 | -1.13067700 |
| O | 3.31426000  | -0.97468100 | 2.06771800  |
| H | 3.17212900  | 0.25909500  | 1.91221200  |
| C | -3.23037600 | -2.71319000 | 0.28473000  |
| H | -4.10639900 | -2.61202400 | 0.93109900  |
| H | -3.56806200 | -2.86751500 | -0.74558100 |
| H | -2.65875900 | -3.58840100 | 0.60664100  |

|   |            |             |             |
|---|------------|-------------|-------------|
| C | 1.53213500 | 1.45001900  | -0.74914500 |
| H | 3.86910100 | -1.10793600 | 2.84740500  |
| H | 1.98001800 | 2.25623900  | -1.33732700 |
| O | 2.97905800 | 1.40536500  | 1.73167500  |
| H | 3.83681700 | 1.79839800  | 1.52006000  |
| H | 2.09845900 | 1.47034000  | 0.25678700  |
| O | 4.37638900 | -1.99604900 | -0.16005000 |
| H | 3.95426000 | -1.44706700 | -0.84553200 |
| H | 4.00514900 | -1.63241700 | 0.69780500  |

### Minimized

### Minimized

### Taxifolin\_anion\_3H2O\_at C8 CAM-B3LYP-D\_631G+d\_water

-1 1

|   |             |             |             |
|---|-------------|-------------|-------------|
| C | -0.43640500 | -0.71426400 | -0.72310300 |
| C | -0.58371700 | 0.66528800  | -0.40143600 |
| C | -1.85141300 | 1.18865600  | -0.06479600 |
| H | 0.84958800  | -2.29372500 | -1.36361900 |
| C | 0.76919900  | -1.24084900 | -1.11320000 |
| C | 0.58052100  | 1.49239300  | -0.49504500 |
| C | 1.93356600  | -0.40140300 | -1.24098800 |
| O | -1.50484100 | -1.55160900 | -0.64660800 |
| O | 0.47640600  | 2.80320500  | -0.18895400 |
| H | -0.46258400 | 2.97784500  | 0.07246000  |
| O | 3.04991300  | -0.88619000 | -1.61133200 |
| O | -2.07460200 | 2.37324500  | 0.28131800  |
| O | -4.06264100 | 0.67315600  | 0.71149500  |
| H | -3.89751200 | 1.62386400  | 0.86285500  |
| C | -2.57918900 | -1.16661800 | 0.23231900  |
| H | -2.18818300 | -1.14915600 | 1.25844800  |
| C | -3.03178400 | 0.23780600  | -0.14368600 |

|   |             |             |             |
|---|-------------|-------------|-------------|
| H | -3.38064900 | 0.22466900  | -1.18927200 |
| O | 3.13955000  | 0.46815800  | 2.09839400  |
| H | 2.56292400  | -0.32958700 | 2.13906300  |
| C | -3.66383700 | -2.20816900 | 0.09530400  |
| H | -4.49438200 | -1.96667100 | 0.76293700  |
| H | -4.03694400 | -2.24054200 | -0.93322500 |
| H | -3.27745700 | -3.19549200 | 0.36183100  |
| C | 1.79097800  | 0.98503900  | -0.89661300 |
| H | 2.67389600  | 1.06061700  | 1.48540900  |
| H | 2.65113000  | 1.64097800  | -0.98820600 |
| O | 1.47845600  | -1.74584100 | 1.95383300  |
| H | 0.68080100  | -1.68827500 | 2.50231100  |
| H | 1.16281300  | -1.68562200 | 1.03005300  |
| O | 5.07853400  | -0.31560000 | 0.16707900  |
| H | 4.42065300  | -0.50413000 | -0.54402800 |
| H | 4.52218900  | -0.05023600 | 0.92865000  |

### Transition State

**Taxifolin\_anion\_3H2O\_at C8\_part\_ CAM-B3LYP-D\_631G+d\_water**

**Imaginary Frequency: -878.06 cm<sup>-1</sup>**

-1 1

|   |             |             |             |
|---|-------------|-------------|-------------|
| C | 0.45945400  | -0.47154200 | 0.62732200  |
| C | 0.73920400  | 0.78105800  | 0.12938000  |
| C | 2.08585400  | 1.10160000  | -0.25032200 |
| H | -0.84531700 | -1.47048800 | 1.98241200  |
| C | -0.88627600 | -0.84320500 | 1.08762800  |
| C | -0.32847800 | 1.77482400  | 0.10919400  |
| C | -1.87557600 | 0.27960200  | 1.23744200  |
| O | 1.34306700  | -1.45215300 | 0.67398500  |
| O | -0.05550600 | 2.97030600  | -0.42105300 |
| H | 0.88631300  | 2.98610100  | -0.72119100 |
| O | -2.95408400 | 0.05167500  | 1.81396300  |

|   |             |             |             |
|---|-------------|-------------|-------------|
| O | 2.43367100  | 2.16301200  | -0.78493300 |
| O | 4.28028900  | 0.23034300  | -0.70851500 |
| H | 4.27280700  | 1.15236700  | -1.02698700 |
| C | 2.56891500  | -1.32783600 | -0.10229000 |
| H | 2.28117900  | -1.45394600 | -1.15266400 |
| C | 3.14027100  | 0.06864100  | 0.09406500  |
| H | 3.38953600  | 0.20884000  | 1.15899200  |
| O | -2.07000800 | -2.41790800 | -1.11170800 |
| H | -2.87782600 | -1.60596700 | -1.58244800 |
| C | 3.49098100  | -2.43414700 | 0.34448200  |
| H | 4.40824700  | -2.40225200 | -0.24793000 |
| H | 3.74891400  | -2.31827800 | 1.40133800  |
| H | 3.01493000  | -3.40668700 | 0.19769800  |
| C | -1.56614000 | 1.53842800  | 0.63219700  |
| H | -2.57750700 | -3.14650200 | -0.72549400 |
| H | -2.31113000 | 2.32590600  | 0.63610700  |
| O | -3.60812400 | -0.76794400 | -2.00873200 |
| H | -4.09071500 | -1.14510300 | -2.75775700 |
| H | -1.31694800 | -1.50254100 | 0.27265100  |
| O | -5.10517600 | 0.31603800  | -0.05034400 |
| H | -4.47293000 | 0.31790100  | 0.69340300  |
| H | -4.59183100 | -0.09084500 | -0.80400700 |
