# Supplementary figures and images for: Can we predict specific numbers of catalytically important molecules of water in H/D exchange in aromatic systems? A combined NMR and DFT study
Source: Royal Society of Chemistry journal article supplement (doi:10.1039/d4nj03276d), 2025-01-01

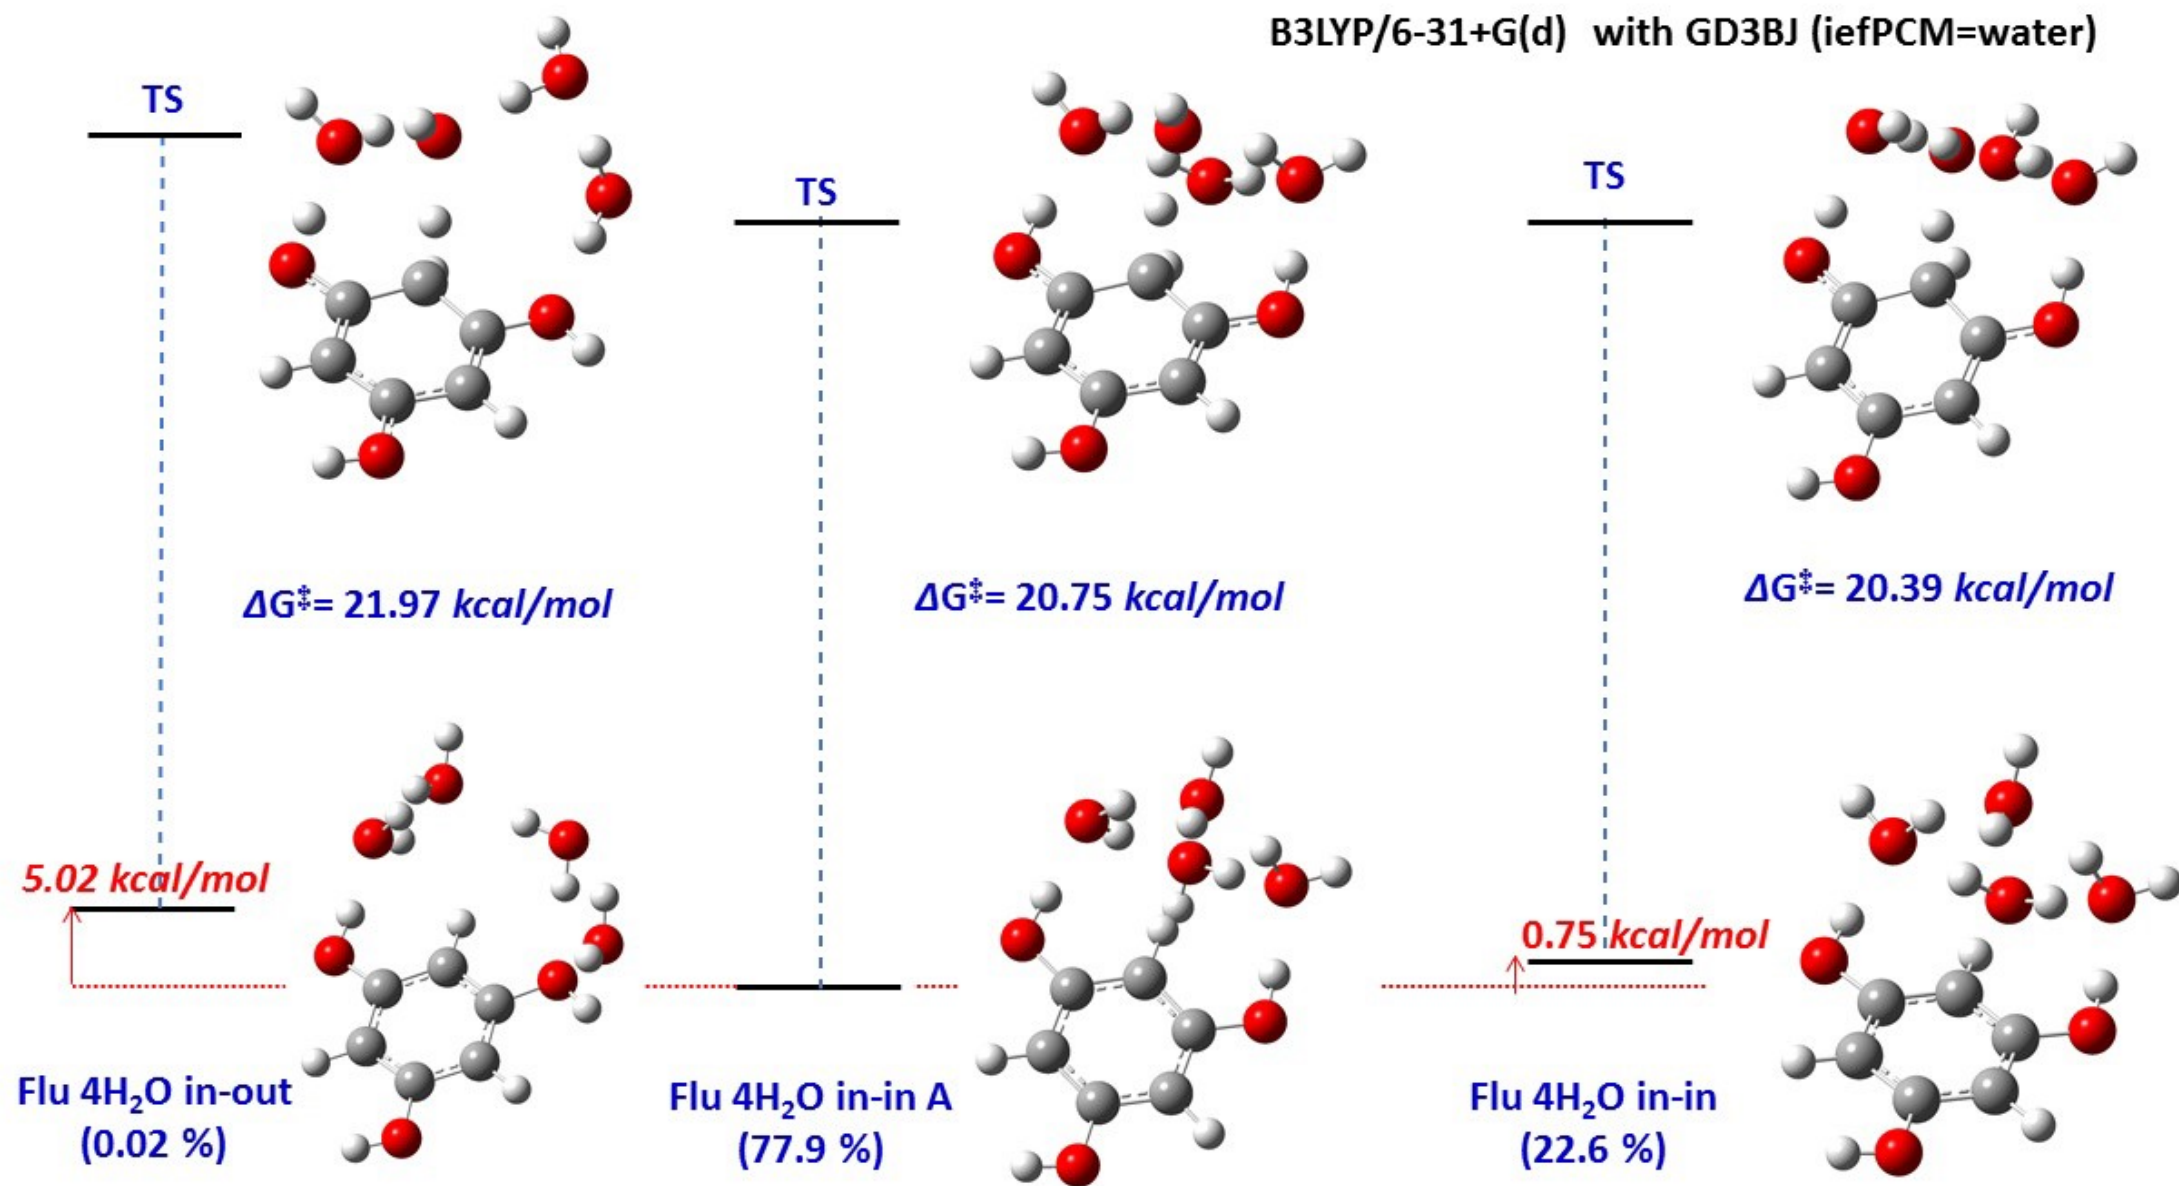

Supplement: d4nj03276d1.pdf [file d4nj03276d1.pdf]

CAM-B3LYP/6-31+G(d) with GD3BJ

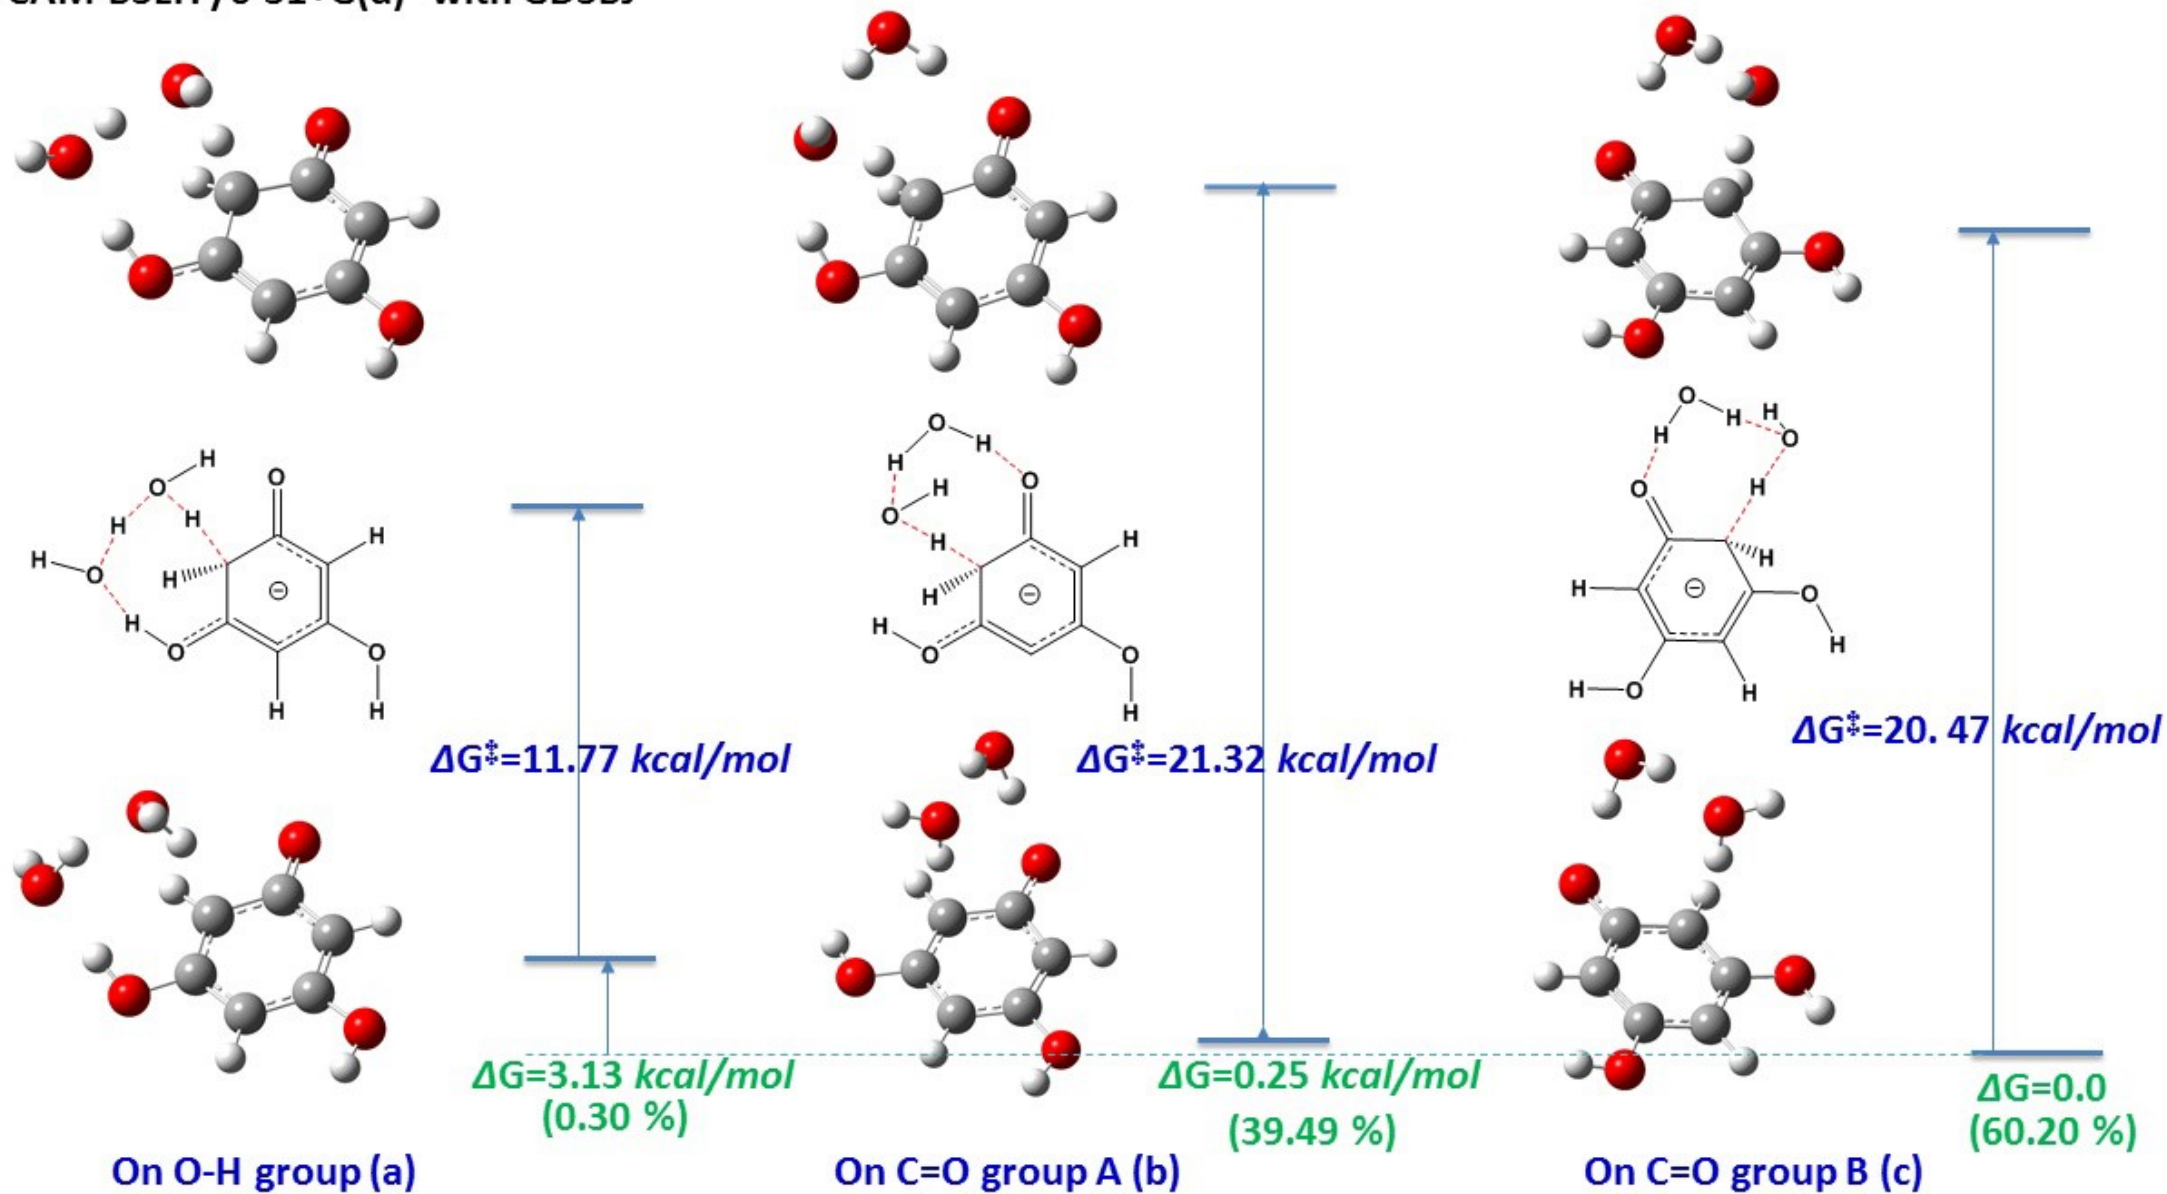

Supplement: d4nj03276d2.pdf [file d4nj03276d2.pdf]
